# Supplementary material for: Degradation of CdS Yellow and Orange Pigments: A Preventive Characterization of the Process through Pump–Probe, Reflectance, X-ray Diffraction, and Raman Spectroscopy
Source: MDPI journal article supplement (doi:10.3390/ma15165533), 2022-08-11
Supplement: s1 [file s1]

## Supporting Information

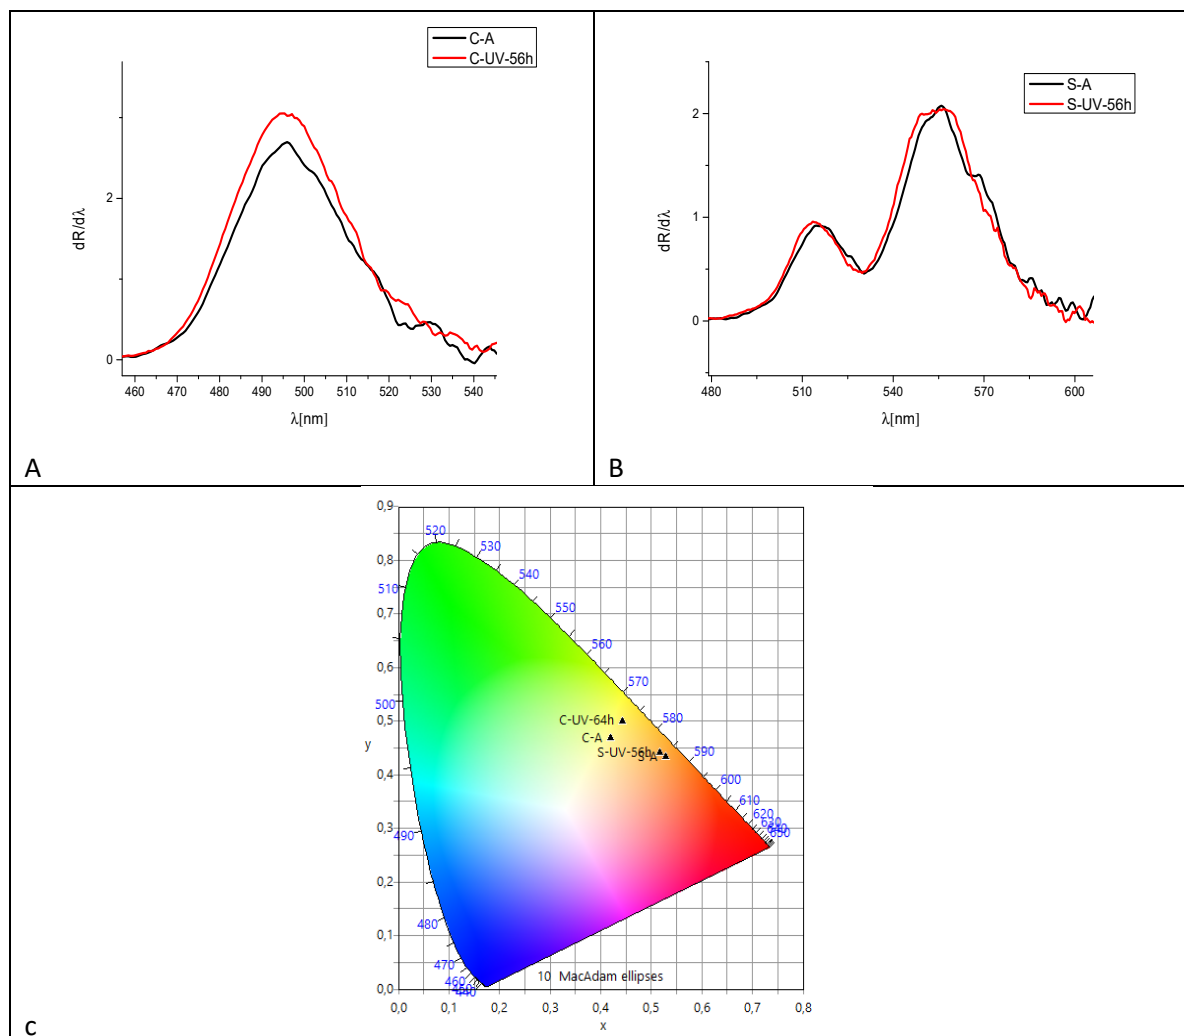

**Figure S1.** First derivative reflectance spectra for C-A samples (a) and S-A sample (b) before and after 56h of UV exposure, c) representation of CIE value of these samples in the CIE color space.

C-A

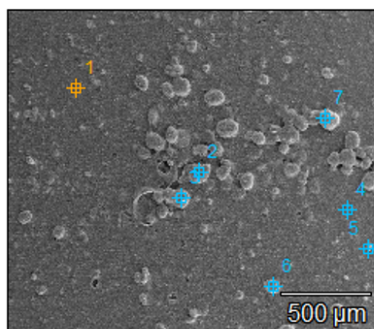

S-A

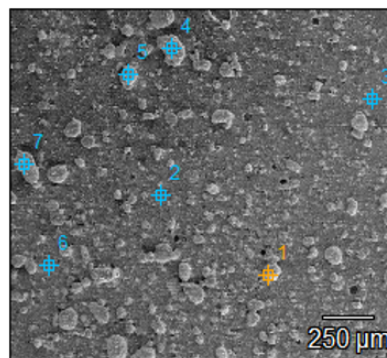

| Element | pt3       | _pt3     | _pt3         | _pt3   | _pt3       |
|---------|-----------|----------|--------------|--------|------------|
|         | Line Type | Weight % | Weight % err | Atom % | Atom % err |
| O       | K         | 18       | 1,4          | 49,9   | 4          |
| K (C)   | K         |          |              |        |            |
| S K     | K         | 17,6     | 0,4          | 24,5   | 0,5        |
| Zn K    | K         | 4,7      | 0,8          | 3,2    | 0,5        |
| Cd L    | L         | 43,8     | 1,5          | 17,3   | 0,6        |
| Ba L    | L         | 16       | 1            | 5,2    | 0,3        |
|         |           | 100      |              | 100    |            |

Table S1. elemental compositions of C-A sample

| Element | _pt7      | _pt7     | _pt7         | _pt7   | _pt7       |
|---------|-----------|----------|--------------|--------|------------|
|         | Line Type | Weight % | Weight % err | Atom % | Atom % err |
| C K (C) | K         | 7,4      | 0,6          | 27,5   | 2,1        |
| O K (C) | K         | 3,4      | 0,6          | 9,5    | 1,6        |
| Si K    | K         | 7,5      | 0,2          | 11,9   | 0,3        |
| S K     | K         | 17,1     | 0,2          | 23,9   | 0,3        |
| Ca K    | K         | 1,5      | 0,1          | 1,7    | 0,1        |
| Se K    | K         | 1,7      | 0,3          | 1      | 0,2        |
| Cd L    | L         | 61,4     | 0,9          | 24,4   | 0,4        |
|         |           | 100      |              | 100    |            |

Table S2. elemental compositions of C-A sample

|                                      | C-A | S-A  |
|--------------------------------------|-----|------|
| $\text{Cd}_{1-x}\text{Zn}_x\text{S}$ | 80% | -    |
| $\text{Cd}(\text{S},\text{Se})$      | -   | 100% |
| $\text{BaSO}_4$                      | 20% | -    |

Table S3. Semi-quantitative analysis based on SEM EDX results for C-A and S-A.

In table S5 for no aged sample are presented the quantitative calculation about CdS and barium sulfate compounds, for aged sample the table shown only the calculation obtained by Cd-saturation and so the total amount 100% is calculated with respect to Cd atom%.

**C-UV**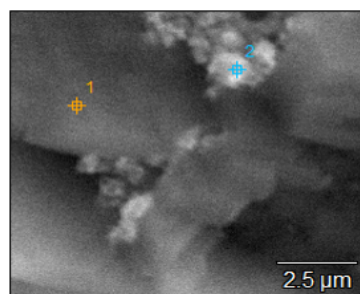**C-UV**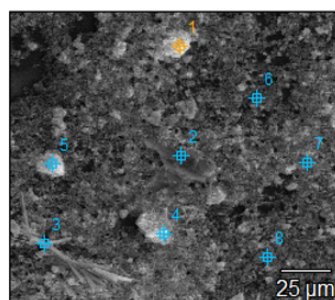

| Element     | pt1       | pt1      | pt1          | pt1    | pt1        |
|-------------|-----------|----------|--------------|--------|------------|
|             | Line Type | Weight % | Weight % err | Atom % | Atom % err |
| <b>C K</b>  | K         | 2,1      | 0,5          | 4,7    | 1,2        |
| <b>O K</b>  | K         | 42,2     | 1,3          | 71,2   | 2,2        |
| <b>Al K</b> | K         | 0        | 0            | 0      | 0          |
| <b>Si K</b> | K         | 2,1      | 0,2          | 2      | 0,2        |
| <b>S K</b>  | K         | 13,3     | 0,2          | 11,1   | 0,2        |
| <b>K K</b>  | K         | 1,1      | 0,2          | 0,8    | 0,1        |
| <b>Ca K</b> | K         | 0,4      | 0,1          | 0,3    | 0,1        |
| <b>Zn K</b> | K         | 3,8      | 0,5          | 1,6    | 0,2        |
| <b>Cd L</b> | L         | 34,3     | 1            | 8,2    | 0,2        |
| <b>Ba L</b> | L         | 0,7      | 0,2          | 0,1    | 0          |
|             |           | 100      |              | 100    |            |

| Element     | pt2       | pt2      | pt2          | pt2    | pt2        |
|-------------|-----------|----------|--------------|--------|------------|
|             | Line Type | Weight % | Weight % err | Atom % | Atom % err |
| <b>O K</b>  | K         | 24       | 1,7          | 55,4   | 3,8        |
| <b>Al K</b> | K         | 0,2      | 0,1          | 0,2    | 0,2        |
| <b>Si K</b> | K         | 2,7      | 0,2          | 3,5    | 0,3        |
| <b>S K</b>  | K         | 17,9     | 0,3          | 20,6   | 0,3        |
| <b>K K</b>  | K         | 0,9      | 0,2          | 0,9    | 0,2        |
| <b>Ca K</b> | K         | 0,5      | 0,1          | 0,5    | 0,1        |
| <b>Zn K</b> | K         | 5,1      | 0,6          | 2,9    | 0,4        |
| <b>Cd L</b> | L         | 48,7     | 1,3          | 16     | 0,4        |
|             |           | 100      |              | 100    |            |

**Table S4.** SEM-EDX quantitative elementary analysis for sample C-UV-56h

C-500-6h

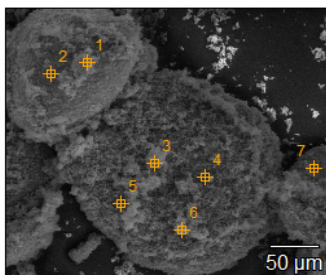

| Element | pt2       | pt2      | pt2          | pt2    | pt2        |
|---------|-----------|----------|--------------|--------|------------|
|         | Line Type | Weight % | Weight % err | Atom % | Atom % err |
| C K     | K         | 2,7      | 0,6          | 7,3    | 1,5        |
| O K     | K         | 28,9     | 1,5          | 59,7   | 3,2        |
| Mg K    | K         | 0,1      | 0,2          | 0,1    | 0,2        |
| Al K    | K         | 0,3      | 0,1          | 0,4    | 0,2        |
| Si K    | K         | 3,1      | 0,1          | 3,7    | 0,2        |
| S K     | K         | 10,8     | 0,3          | 11,1   | 0,3        |
| K K     | K         | 0,4      | 0,3          | 0,3    | 0,2        |
| Ca K    | K         | 0,3      | 0,1          | 0,3    | 0,1        |
| Zn K    | K         | 6,5      | 0,8          | 3,3    | 0,4        |
| Cd L    | L         | 46,9     | 1,4          | 13,8   | 0,4        |
|         |           | 100      |              | 100    |            |

  

| Element | pt3       | pt3      | pt3          | pt3    | pt3        |
|---------|-----------|----------|--------------|--------|------------|
|         | Line Type | Weight % | Weight % err | Atom % | Atom % err |
| O K     | K         | 26,7     | 1,6          | 61,5   | 3,6        |
| Al K    | K         | 0,2      | 0,1          | 0,3    | 0,2        |
| Si K    | K         | 3,3      | 0,2          | 4,3    | 0,2        |
| S K     | K         | 11,3     | 0,3          | 13     | 0,3        |
| K K     | K         | 0,6      | 0,3          | 0,6    | 0,2        |
| Ca K    | K         | 0,6      | 0,1          | 0,6    | 0,1        |
| Zn K    | K         | 6        | 0,8          | 3,4    | 0,4        |
| Cd L    | L         | 44,8     | 1,4          | 14,7   | 0,5        |
| Ba L    | L         | 6,4      | 0,4          | 1,7    | 0,1        |
|         |           | 100      |              | 100    |            |

**Table S5.** SEM-EDX quantitative elementary analysis for sample C-500-6h

S-500-6h

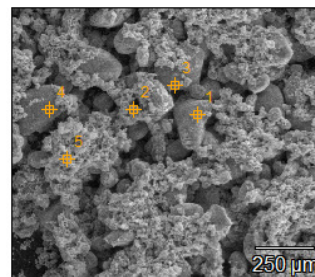

| Element | pt1       | pt1      | pt1          | pt1    | pt1        |
|---------|-----------|----------|--------------|--------|------------|
|         | Line Type | Weight % | Weight % err | Atom % | Atom % err |
| C K     | K         | 5,1      | 0,6          | 13,6   | 1,6        |
| O K     | K         | 31,2     | 1,5          | 62,3   | 3          |
| Al K    | K         | 0        |              | 0      |            |
| S K     | K         | 7,9      | 0,2          | 7,9    | 0,2        |
| K K     | K         | 0,8      | 0,2          | 0,6    | 0,2        |
| Cd L    | L         | 55       | 1,2          | 15,6   | 0,3        |
|         |           | 100      |              | 100    |            |

| Element | _pt5      | pt5      | pt5          | pt5    | pt5        |
|---------|-----------|----------|--------------|--------|------------|
|         | Line Type | Weight % | Weight % err | Atom % | Atom % err |
| C K     | K         | 5        | 0,7          | 13,1   | 1,8        |
| O K     | K         | 32       | 1,6          | 62,5   | 3,1        |
| Al K    | K         | 0        |              | 0      |            |
| Si K    | K         | 0,5      | 0,1          | 0,5    | 0,1        |
| S K     | K         | 8,3      | 0,2          | 8,2    | 0,2        |
| K K     | K         | 0,6      | 0,2          | 0,5    | 0,2        |
| Cd L    | L         | 52,2     | 0,7          | 15,2   | 0,3        |
|         |           | 100      |              | 100    |            |

**Table S6.** SEM-EDX quantitative elementary analysis for sample S-500-6h
